# Supplementary material for: Suppression of SHP-1 promotes corticospinal tract sprouting and functional recovery after brain injury
Source: PubMed Central journal article supplement — Cell Death Dis. 2013 Apr 4;4(4):e567–. doi: 10.1038/cddis.2013.102 (PMC3641325; doi:10.1038/cddis.2013.102), 2013-04-04

## Supplemental figures

**Figure 1** Midline crossing of the intact CST in cervical cord. **(a)** Representative transverse sections of the cervical cord obtained from intact wild-type and  $+/me^v$  mice. BDA was injected into the right motor cortex of 6 weeks old mice. The sprouting axons from the BDA-positive CST (green) crossed the midline into the right side of the cervical cord. Dotted lines indicate midline of cervical cord. Scale bars, 500  $\mu\text{m}$  (upper panel); 200  $\mu\text{m}$  (lower panel). **(b)** The number of CST axons crossing the midline of the cervical cord (C4–C7) in intact wild-type and  $+/me^v$  mice, normalized by the total number of labeled main CST fibers. Data are presented as mean  $\pm$  SEM (wild-type, n = 7;  $+/me^v$ , n = 5).

**Figure 2** Cortical injury in wild-type and  $+/me^v$  mice. **(a)** Nissl staining showing cortical ablation in the injured left hemisphere (28 days after injury). Scale bar, 1 mm. **(b and c)** Quantitative data of the cortical lesion volume in wild-type and  $+/me^v$  mice **(b)** or saline- and NSC-87877-treated mice **(c)**. Data are presented as mean  $\pm$  SEM (wild-type, n = 9;  $+/me^v$ , n = 9; saline group, n = 4; NSC-87877 group, n = 5). **(d)** PKC  $\gamma$  immunoreactivity of the dorsal CST in the cervical cord (28 days after injury). Scale bar, 100  $\mu\text{m}$ . **(e and f)** Quantitative data of PKC  $\gamma$ -positive CST damage in wild-type and  $+/me^v$  mice **(e)** or saline- and NSC-87877-treated mice **(f)**. Data are presented as mean  $\pm$  SEM (wild-type, n = 11;  $+/me^v$ , n = 9; saline, n = 7; NSC-87877, n = 7).

# Supplemental Figure 1

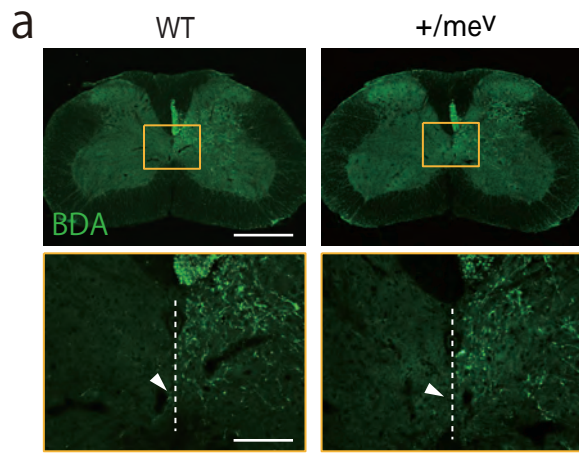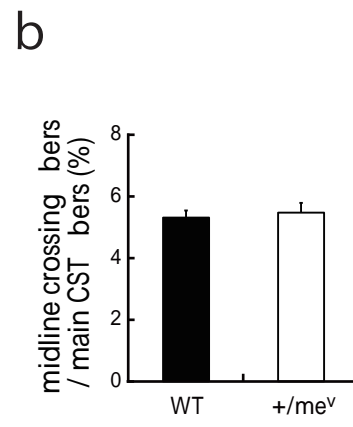

# Supplemental Figure 2

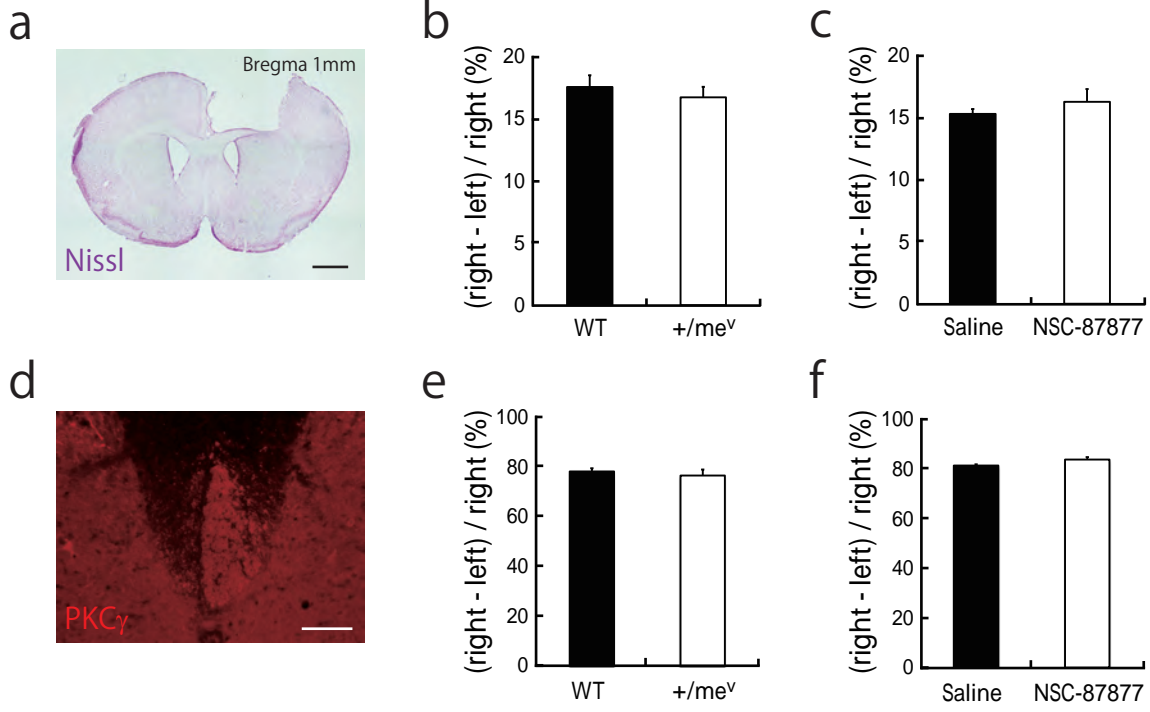

Supplement: cddis2013102x1.pdf [file cddis2013102x1.pdf]
